# Supplementary material for: Impact of genetic variants on clinical outcome after percutaneous coronary intervention in elderly patients
Source: Aging (Albany NY). 2021 Mar 12;13(5):6506–24. doi: 10.18632/aging.202799 (PMC7993709; doi:10.18632/aging.202799)
Supplement: Supplementary Tables [file aging-13-202799-s002.pdf]

## SUPPLEMENTARY TABLES

**Supplementary Table 1. Baseline characteristics and genomic variation in elderly patients (≥75 years of age).**

|                                           | <b>Total<br/>(n=811)</b> |
|-------------------------------------------|--------------------------|
| <b>Age (years)</b>                        | 79.1±3.6                 |
| <b>Male sex</b>                           | 433 (53.3%)              |
| <b>Body-mass index (kg/m<sup>2</sup>)</b> | 23.7±3.4                 |
| <b>Hypertension</b>                       | 594 (73.2%)              |
| <b>Diabetes mellitus</b>                  | 278 (34.3%)              |
| <b>Hypercholesterolemia</b>               | 252 (31.1%)              |
| <b>Previous MI</b>                        | 51 (6.3%)                |
| <b>Previous PCI</b>                       | 126 (15.5%)              |
| <b>Previous CABG</b>                      | 11 (1.4%)                |
| <b>Previous CVA</b>                       | 91 (11.2%)               |
| <b>Congestive heart failure</b>           | 52 (6.4%)                |
| <b>Chronic kidney disease</b>             | 53 (6.5%)                |
| <b>Familial history of CAD</b>            | 28 (3.5%)                |
| <b>Presentation with ACS</b>              | 452 (55.7%)              |
| <b>CYP2C19</b>                            |                          |
| - Normal metabolizer (*1/*1)              | 298 (36.7%)              |
| - Intermediate metabolizer                | 396 (48.8%)              |
| *1/*2                                     | 292 (36.0%)              |
| *1/*3                                     | 104 (12.8%)              |
| - Poor metabolizer                        | 117 (14.4%)              |
| *2/*2                                     | 66 (8.1%)                |
| *2/*3                                     | 40 (4.9%)                |
| *3/*3                                     | 11 (1.4%)                |
| <b>P2Y12 G52T (rs6809699)</b>             |                          |
| - GG                                      | 598 (73.7%)              |
| - GT                                      | 187 (23.1%)              |
| - TT                                      | 26 (3.2%)                |

Data are number of patients (%) or mean (SD). ACS, acute coronary syndrome; CABG, coronary artery bypass graft; CAD, coronary artery disease; CVA, cerebrovascular accident; PCI, percutaneous coronary intervention.

**Supplementary Table 2. Other genetic variations (PON1 and ABCB1) and lesion characteristics according to CYP2C19 variant in elderly patients (≥75 years of age).**

|                                        | <b>NM or IM<br/>(N=694)</b> | <b>PM<br/>(N=117)</b> | <b>P</b> |
|----------------------------------------|-----------------------------|-----------------------|----------|
| <b>PON1</b>                            |                             |                       | 0.738    |
| - RR                                   | 266 (38.3%)                 | 48 (41.0%)            |          |
| - QR                                   | 353 (50.9%)                 | 55 (47.0%)            |          |
| - QQ                                   | 75 (10.8%)                  | 14 (12.0%)            |          |
| <b>ABCB1</b>                           |                             |                       | 0.678    |
| - CC                                   | 287 (41.4%)                 | 44 (37.6%)            |          |
| - CT                                   | 314 (45.2%)                 | 58 (49.6%)            |          |
| - TT                                   | 93 (13.4%)                  | 15 (12.8%)            |          |
| <b>Multivessel disease</b>             | 111 (16.0%)                 | 21 (17.9%)            | 0.693    |
| <b>Left anterior descending artery</b> | 400 (57.6%)                 | 79 (67.5%)            | 0.056    |
| <b>Left circumflex artery</b>          | 157 (22.6%)                 | 26 (22.2%)            | 1.000    |
| <b>Right coronary artery</b>           | 250 (36.0%)                 | 35 (29.9%)            | 0.240    |
| <b>Left main</b>                       | 31 (4.5%)                   | 7 (6.0%)              | 0.630    |
| <b>Exist of visible thrombus</b>       | 30 (4.3%)                   | 5 (4.3%)              | 1.000    |
| <b>Thrombosuction</b>                  | 33 (4.8%)                   | 2 (1.7%)              | 0.210    |
| <b>Number of stents</b>                |                             |                       | 0.275    |
| - 1                                    | 518 (74.6%)                 | 82 (70.1%)            |          |
| - 2                                    | 136 (19.6%)                 | 25 (21.4%)            |          |
| - 3 or over                            | 40 (5.8%)                   | 10 (8.6%)             |          |
| <b>Number of lesions</b>               | 1.4 ± 1.1                   | 1.6 ± 1.3             | 0.197    |
| <b>Minimal stent size</b>              | 2.9 ± 0.4                   | 2.8 ± 0.4             | 0.072    |
| <b>Total length of stent</b>           | 31.3 ± 17.6                 | 33.4 ± 21.6           | 0.319    |

Data are number of patients (%) or mean (SD).

**Supplementary Table 3. In-hospital event, discharge medication, P2Y12 reaction unit, and dual antiplatelet therapy duration according to CYP2C19 variant in elderly patients (≥75 years of age).**

|                               | NM or IM<br>(N=694) | PM<br>(N=117) | P-value |
|-------------------------------|---------------------|---------------|---------|
| <b>In-hospital event</b>      |                     |               |         |
| <b>Death</b>                  | 0 (0.0%)            | 1 (0.9%)      | 0.311   |
| <b>TLR</b>                    | 0 (0.0%)            | 0 (0.0%)      | -       |
| <b>Myocardial infarction</b>  | 6 (0.9%)            | 0 (0.0%)      | 0.670   |
| <b>Stent thrombosis</b>       | 0 (0.0%)            | 0 (0.0%)      | -       |
| <b>Stroke</b>                 | 2 (0.3%)            | 0 (0.0%)      | 1.000   |
| <b>Bleeding</b>               | 30 (4.3%)           | 6 (5.1%)      | 0.882   |
| <b>Discharge medication</b>   |                     |               |         |
| <b>Aspirin</b>                | 690 (99.4%)         | 116 (99.1%)   | 1.000   |
| <b>Clopidogrel</b>            | 685 (98.7%)         | 117 (100.0%)  | 0.446   |
| <b>Cilostazol</b>             | 43 (6.2%)           | 10 (8.5%)     | 0.453   |
| <b>Proton pump inhibitor</b>  | 147 (21.2%)         | 24 (20.5%)    | 0.967   |
| <b>CCB</b>                    | 196 (28.2%)         | 36 (30.8%)    | 0.653   |
| <b>Statin</b>                 | 646 (93.1%)         | 110 (94.0%)   | 0.863   |
| <b>ARB</b>                    | 270 (38.9%)         | 52 (44.4%)    | 0.303   |
| <b>ACEi</b>                   | 172 (24.8%)         | 26 (22.2%)    | 0.631   |
| <b>BB</b>                     | 402 (57.9%)         | 76 (65.0%)    | 0.184   |
| <b>Platelet function test</b> |                     |               |         |
| <b>VerifyNow PRU</b>          | 234.0±74.8          | 269.9±82.8    | <0.001  |
| <b>VerifyNow inhibition</b>   | 25.0±25.6           | 17.7±38.2     | 0.049   |
| <b>Duration of DAPT</b>       |                     |               |         |
| <b>Total duration (days)</b>  | 322.7±87.1          | 313.7±103.0   | 0.373   |
| <b>&gt;6 months</b>           | 600 (86.5%)         | 99 (84.6%)    | 0.697   |
| <b>&gt;12 months</b>          | 569 (82.0%)         | 97 (82.9%)    | 0.913   |

Data are number of patients (%) or mean (SD). ACEi, angiotensin-converting-enzyme inhibitor; ARB, angiotensin II receptor blocker; BB, beta blocker; CCB, calcium channel blocker; DAPT, dual antiplatelet therapy; IM, intermediate metabolizer; NM, normal metabolizer; PM, poor metabolizer; PRU, P2Y12 reaction unit; TLR, target lesion revascularization.

**Supplementary Table 4. Other genetic variations (PON1 and ABCB1) and lesion characteristics according to P2Y12 G52T polymorphism in elderly patients (≥75 years of age).**

|                                        | <b>GG<br/>(N=598)</b> | <b>GT<br/>(N=187)</b> | <b>TT<br/>(N=26)</b> | <b>P</b> |
|----------------------------------------|-----------------------|-----------------------|----------------------|----------|
| <b>PON1</b>                            |                       |                       |                      | 0.486    |
| - RR                                   | 231 (38.6%)           | 71 (38.0%)            | 12 (46.2%)           |          |
| - QR                                   | 304 (50.8%)           | 95 (50.8%)            | 9 (34.6%)            |          |
| - QQ                                   | 63 (10.5%)            | 21 (11.2%)            | 5 (19.2%)            |          |
| <b>ABCB1</b>                           |                       |                       |                      | 0.881    |
| - CC                                   | 245 (41.0%)           | 75 (40.1%)            | 11 (42.3%)           |          |
| - CT                                   | 276 (46.2%)           | 86 (46.0%)            | 10 (38.5%)           |          |
| - TT                                   | 77 (12.9%)            | 26 (13.9%)            | 5 (19.2%)            |          |
| <b>Multivessel disease</b>             | 91 (15.2%)            | 39 (20.9%)            | 2 (7.7%)             | 0.092    |
| <b>Left anterior descending artery</b> | 355 (59.4%)           | 107 (57.2%)           | 17 (65.4%)           | 0.699    |
| <b>Left circumflex artery</b>          | 128 (21.4%)           | 47 (25.1%)            | 8 (30.8%)            | 0.338    |
| <b>Right coronary artery</b>           | 204 (34.1%)           | 78 (41.7%)            | 3 (11.5%)            | 0.006    |
| <b>Left main</b>                       | 29 (4.8%)             | 9 (4.8%)              | 0 (0.0%)             | 0.517    |
| <b>Exist of visible thrombus</b>       | 30 (5.0%)             | 3 (1.6%)              | 2 (7.7%)             | 0.093    |
| <b>Thrombosuction</b>                  | 30 (5.0%)             | 3 (1.6%)              | 2 (7.7%)             | 0.093    |
| <b>Number of stents</b>                |                       |                       |                      | 0.793    |
| - 1                                    | 451 (75.4%)           | 129 (69.0%)           | 20 (76.9%)           |          |
| - 2                                    | 111 (18.6%)           | 45 (24.1%)            | 5 (19.2%)            |          |
| - 3 or over                            | 36 (6.0%)             | 13 (6.9%)             | 1 (3.9%)             |          |
| <b>Number of lesions</b>               | 1.5 ± 1.2             | 1.4 ± 0.9             | 1.1 ± 0.3            | 0.285    |
| <b>Minimal stent size</b>              | 2.9 ± 0.4             | 2.9 ± 0.4             | 2.9 ± 0.3            | 0.750    |
| <b>Total length of stent</b>           | 31.0 ± 17.5           | 34.0 ± 20.5           | 29.9 ± 16.0          | 0.125    |

Data are number of patients (%) or mean (SD).

**Supplementary Table 5. In-hospital event, discharge medication, P2Y12 reaction unit, and dual antiplatelet therapy duration according to P2Y12 G52T polymorphism in elderly patients ( $\geq 75$  years of age).**

|                               | <b>GG<br/>(N=598)</b> | <b>GT<br/>(N=187)</b> | <b>TT<br/>(N=26)</b> | <b>P-value</b> |
|-------------------------------|-----------------------|-----------------------|----------------------|----------------|
| <b>In-hospital event</b>      |                       |                       |                      |                |
| <b>Death</b>                  | 1 (0.2%)              | 0 (0.0%)              | 0 (0.0%)             | 0.837          |
| <b>TLR</b>                    | 0 (0.0%)              | 0 (0.0%)              | 0 (0.0%)             | -              |
| <b>Myocardial infarction</b>  | 5 (0.8%)              | 1 (0.5%)              | 0 (0.0%)             | 0.828          |
| <b>Stent thrombosis</b>       | 0 (0.0%)              | 0 (0.0%)              | 0 (0.0%)             | -              |
| <b>Stroke</b>                 | 0 (0.0%)              | 1 (0.5%)              | 1 (3.8%)             | <0.001         |
| <b>Bleeding</b>               | 27 (4.5%)             | 4 (2.1%)              | 5 (19.2%)            | <0.001         |
| <b>Discharge medication</b>   |                       |                       |                      |                |
| <b>Aspirin</b>                | 593 (99.2%)           | 187 (100.0%)          | 26 (100.0%)          | 0.408          |
| <b>Clopidogrel</b>            | 591 (98.8%)           | 185 (98.9%)           | 26 (100.0%)          | 0.854          |
| <b>Cilostazol</b>             | 36 (6.0%)             | 14 (7.5%)             | 3 (11.5%)            | 0.449          |
| <b>Proton pump inhibitor</b>  | 129 (21.6%)           | 35 (18.7%)            | 7 (26.9%)            | 0.536          |
| <b>CCB</b>                    | 169 (28.3%)           | 53 (28.3%)            | 10 (38.5%)           | 0.528          |
| <b>Statin</b>                 | 556 (93.0%)           | 175 (93.6%)           | 25 (96.2%)           | 0.799          |
| <b>ARB</b>                    | 239 (40.0%)           | 73 (39.0%)            | 10 (38.5%)           | 0.966          |
| <b>ACEi</b>                   | 145 (24.2%)           | 50 (26.7%)            | 3 (11.5%)            | 0.236          |
| <b>BB</b>                     | 352 (58.9%)           | 107 (57.2%)           | 19 (73.1%)           | 0.305          |
| <b>Platelet function test</b> |                       |                       |                      |                |
| <b>VerifyNow PRU</b>          | 238.4 $\pm$ 77.2      | 239.4 $\pm$ 78.5      | 254.2 $\pm$ 60.8     | 0.593          |
| <b>VerifyNow inhibition</b>   | 24.4 $\pm$ 30.2       | 23.6 $\pm$ 20.5       | 16.5 $\pm$ 15.5      | 0.363          |
| <b>Duration of DAPT</b>       |                       |                       |                      |                |
| <b>Total duration (days)</b>  | 319.4 $\pm$ 91.0      | 324.4 $\pm$ 89.4      | 346.5 $\pm$ 39.1     | 0.280          |
| <b>&gt; 6 months</b>          | 506 (84.6%)           | 163 (87.2%)           | 25 (96.2%)           | 0.203          |
| <b>&gt; 12 months</b>         | 467 (78.1%)           | 156 (83.4%)           | 22 (84.6%)           | 0.233          |

Data are number of patients (%) or mean (SD). ACEi, angiotensin-converting-enzyme inhibitor; ARB, angiotensin II receptor blocker; BB, beta blocker; CCB, calcium channel blocker; DAPT, dual antiplatelet therapy; PRU, P2Y12 reaction unit; TLR, target lesion revascularization.

**Supplementary Table 6. Clinical presentation, duration of DAPT, PRU, and in-hospital event according to PON1 variant.**

|                               | <b>RR<br/>(N=314)</b> | <b>QR<br/>(N=408)</b> | <b>QQ<br/>(N=89)</b> | <b>p</b> |
|-------------------------------|-----------------------|-----------------------|----------------------|----------|
| <b>Presentation with ACS</b>  | 177 (56.4%)           | 222 (54.4%)           | 53 (59.6%)           | 0.649    |
| <b>Duration of DAPT</b>       |                       |                       |                      |          |
| <b>Total duration (days)</b>  | 329.4 ± 78.0          | 315.2 ± 98.1          | 322.2 ± 85.3         | 0.106    |
| <b>&gt; 12 months</b>         | 259 (82.5%)           | 315 (77.2%)           | 71 (79.8%)           | 0.219    |
| <b>Platelet function test</b> |                       |                       |                      |          |
| <b>VerifyNow PRU</b>          | 237.5 ± 81.3          | 239.3 ± 74.2          | 244.6 ± 74.5         | 0.743    |
| <b>In-hospital event</b>      |                       |                       |                      |          |
| <b>Death</b>                  | 0 (0.0%)              | 1 (0.2%)              | 0 (0.0%)             | 0.610    |
| <b>TLR</b>                    | 0 (0.0%)              | 0 (0.0%)              | 0 (0.0%)             | -        |
| <b>Myocardial infarction</b>  | 3 (1.0%)              | 2 (0.5%)              | 1 (1.1%)             | 0.696    |
| <b>Stent thrombosis</b>       | 0 (0.0%)              | 0 (0.0%)              | 0 (0.0%)             | -        |
| <b>Stroke</b>                 | 0 (0.0%)              | 2 (0.5%)              | 0 (0.0%)             | 0.372    |
| <b>Bleeding</b>               | 11 (3.5%)             | 20 (4.9%)             | 5 (5.6%)             | 0.564    |

ACS, acute coronary syndrome; DAPT, dual antiplatelet therapy; TLR, target lesion revascularization; PRU, P2Y12 reaction unit.

**Supplementary Table 7. Clinical presentation, duration of DAPT, PRU, and in-hospital event according to ABCB1 variant.**

|                               | <b>CC<br/>(N=331)</b> | <b>CT<br/>(N=372)</b> | <b>TT<br/>(N=108)</b> | <b>p</b> |
|-------------------------------|-----------------------|-----------------------|-----------------------|----------|
| <b>Presentation with ACS</b>  | 175 (52.9%)           | 212 (57.0%)           | 65 (60.2%)            | 0.332    |
| <b>Duration of DAPT</b>       |                       |                       |                       |          |
| <b>Total duration (days)</b>  | 320.0 ± 88.9          | 321.9 ± 92.3          | 324.3 ± 82.4          | 0.902    |
| <b>&gt; 12 months</b>         | 258 (77.9%)           | 302 (81.2%)           | 85 (78.7%)            | 0.554    |
| <b>Platelet function test</b> |                       |                       |                       |          |
| <b>VerifyNow PRU</b>          | 239.2 ± 75.6          | 242.5 ± 77.3          | 227.5 ± 79.6          | 0.205    |
| <b>In-hospital event</b>      |                       |                       |                       |          |
| <b>Death</b>                  | 0 (0.0%)              | 1 (0.3%)              | 0 (0.0%)              | 0.554    |
| <b>TLR</b>                    | 0 (0.0%)              | 0 (0.0%)              | 0 (0.0%)              | -        |
| <b>Myocardial infarction</b>  | 3 (0.9%)              | 2 (0.5%)              | 1 (0.9%)              | 0.826    |
| <b>Stent thrombosis</b>       | 0 (0.0%)              | 0 (0.0%)              | 0 (0.0%)              | -        |
| <b>Stroke</b>                 | 1 (0.3%)              | 1 (0.3%)              | 0 (0.0%)              | 0.854    |
| <b>Bleeding</b>               | 15 (4.5%)             | 15 (4.0%)             | 6 (5.6%)              | 0.791    |

ACS, acute coronary syndrome; DAPT, dual antiplatelet therapy; TLR, target lesion revascularization; PRU, P2Y12 reaction unit.
